# Supplementary figures and images for: Advice to Clinicians on Communication from Adolescents and Young Adults with Cancer and Parents of Children with Cancer
Source: MDPI journal article supplement (doi:10.3390/children10010007), 2022-12-21

**Figure S1. Parent characteristics**

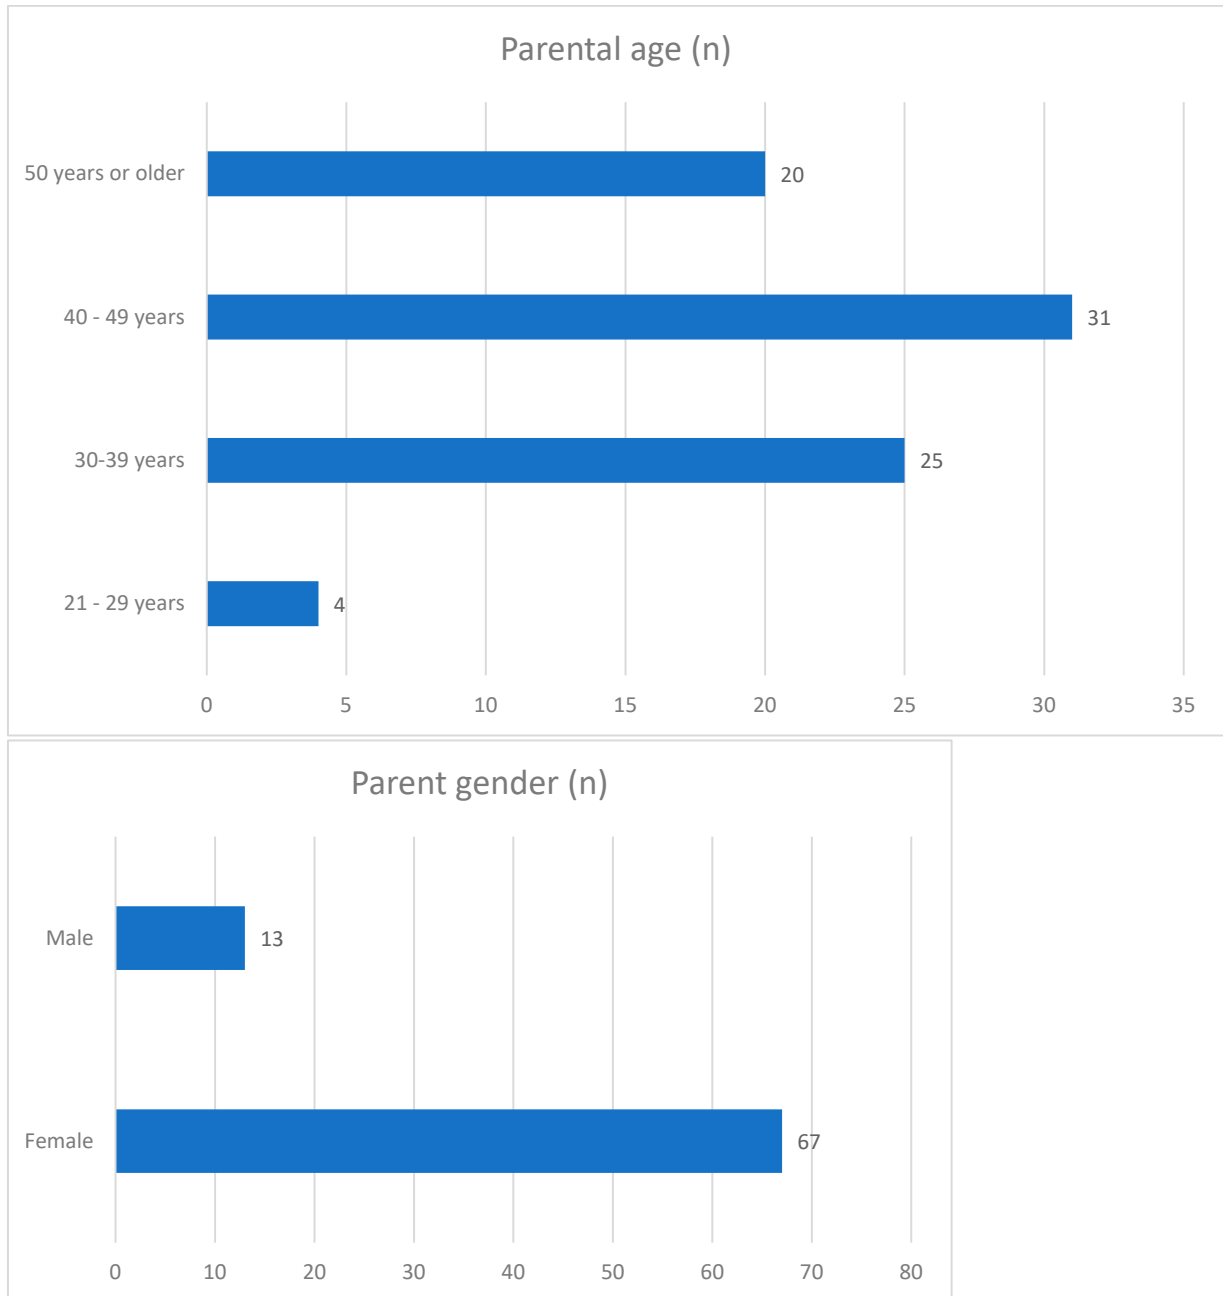

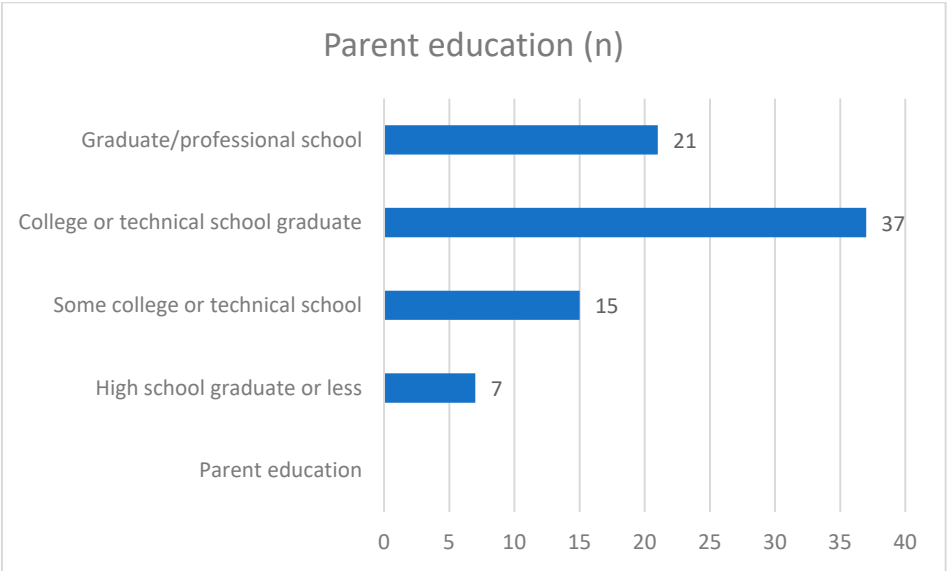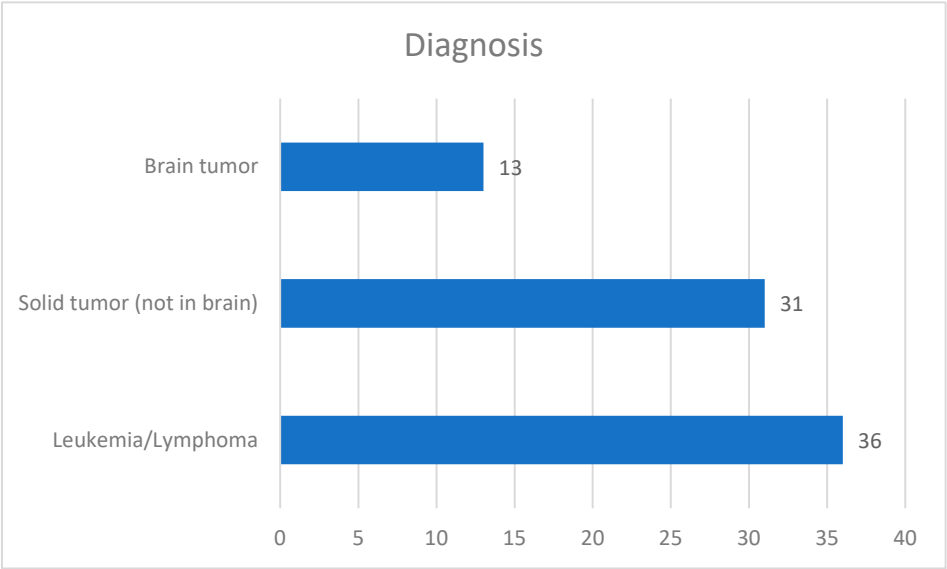

**Figure S2. AYA characteristics**

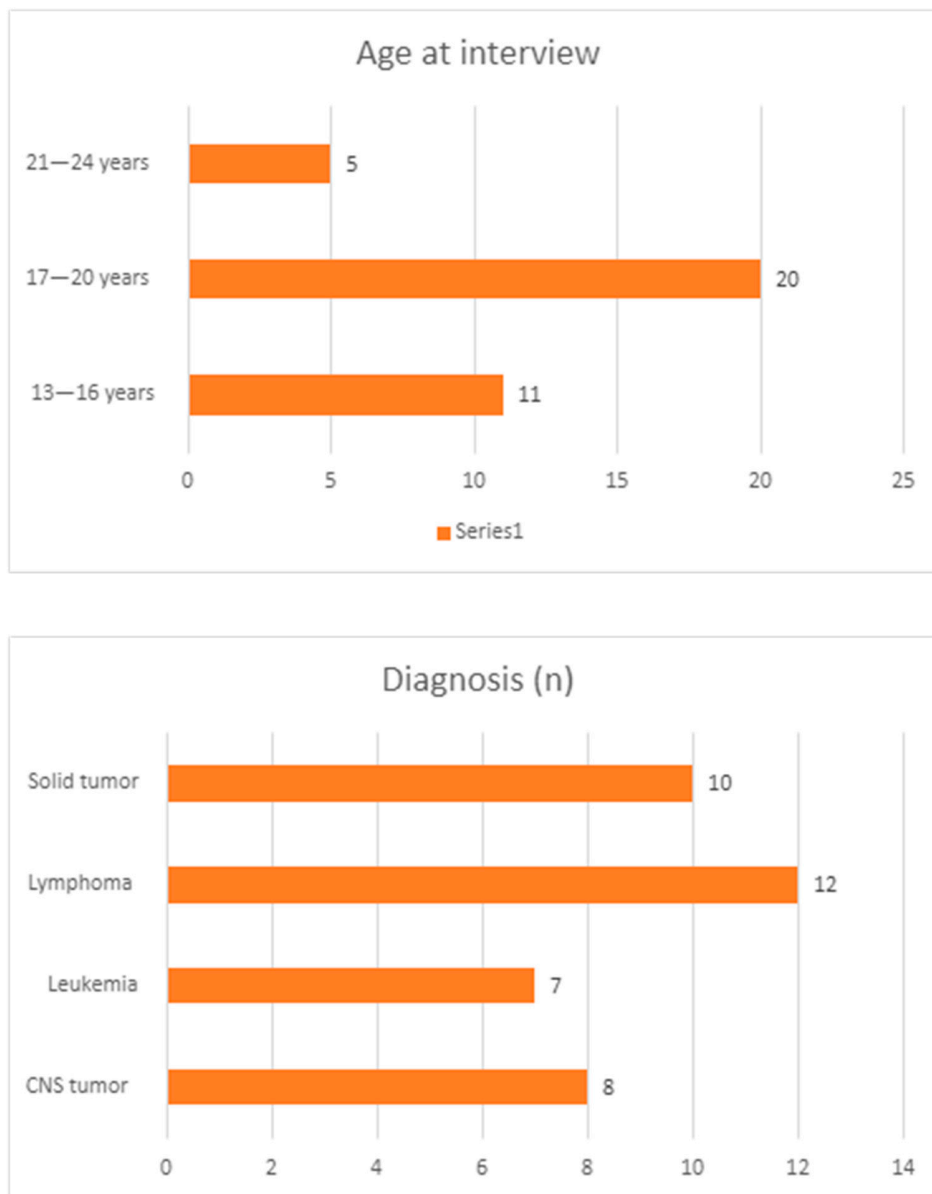

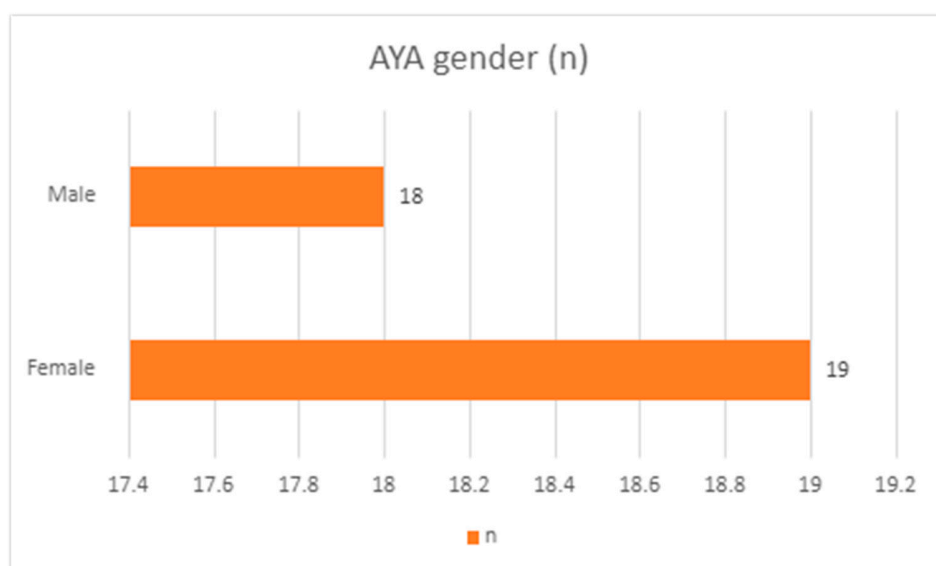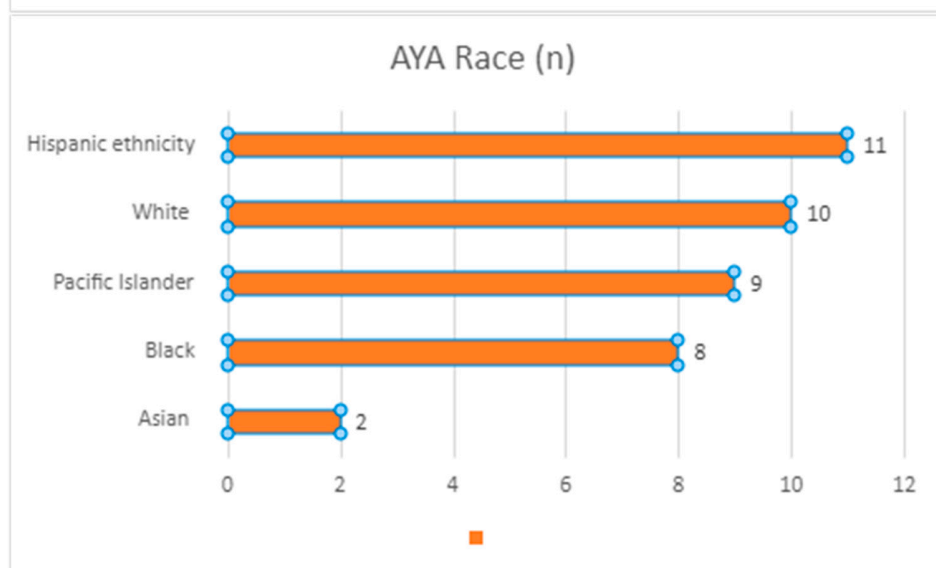

Supplement: s1 [file s1]
